# Supplementary material
Source: publisher figshare collection journal article supplement (https://karger.figshare.com/articles/dataset/_/5372920)
Supplement: Supplementary file 1 [file 1]

Archive with 6 entries (6 files):
- BPU479576_Poster_6.pdf
- BPU479576_Poster_1.pdf
- BPU479576_Poster_2.pdf
- BPU479576_Poster_3.pdf
- BPU479576_Poster_4.pdf
- BPU479576_Poster_5.pdf
