# Supplementary material
Source: publisher figshare collection journal article supplement (https://karger.figshare.com/articles/dataset/_/5372920)
Supplement: Supplementary file 1 [file 1 › BPU479576_Poster_1.pdf]

# Cambodia Country Status

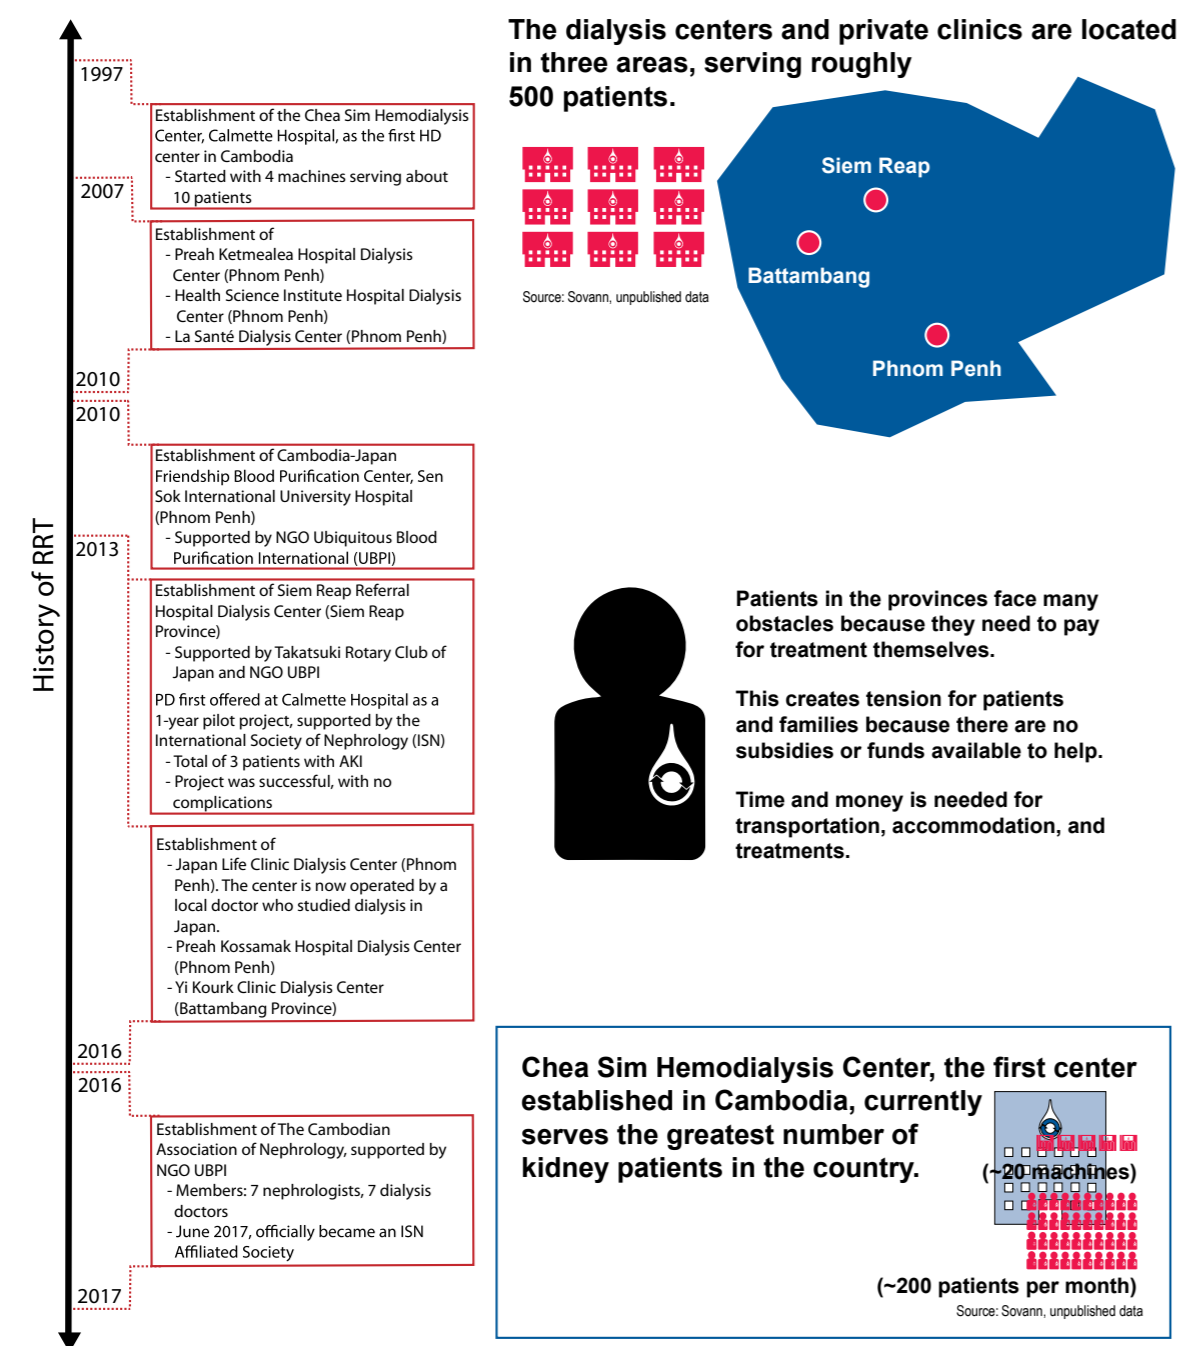

The average monthly wage for Cambodians is around **150 USD**.

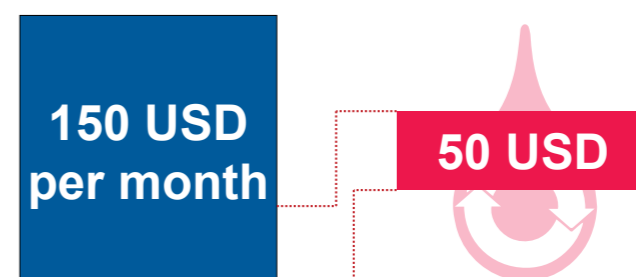

The fee for one dialysis session is around **50 USD**.

Source: Naganuma T, Takemoto Y. Prospects for Vascular Access Education in Developing Countries: Current Situation in Cambodia. *Contrib Nephrol*. 2017;189:110-113

## Challenges going forward for Cambodia (2017)

- 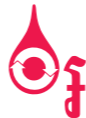 No fund exists to help patients pay for HD treatment.
- 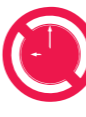 Dialysis sessions and checkup appointments are often missed.
- 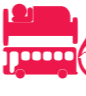 Time and money needed for transportation, accommodation, and treatment is especially high for patients in the provinces.
- 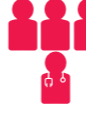 There are fewer than 10 nephrologists for a population of over 15 million.
- 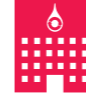 Dialysis centers are available only in Phnom Penh, Battambang, and Siem Reap.

Fig. 1. Sovann, Blood Purif 2017;44(suppl 1):22-25.
