# Supplementary material
Source: publisher figshare collection journal article supplement (https://karger.figshare.com/articles/dataset/_/5372920)
Supplement: Supplementary file 1 [file 1 › BPU479576_Poster_4.pdf]

### Mongolia Country Status

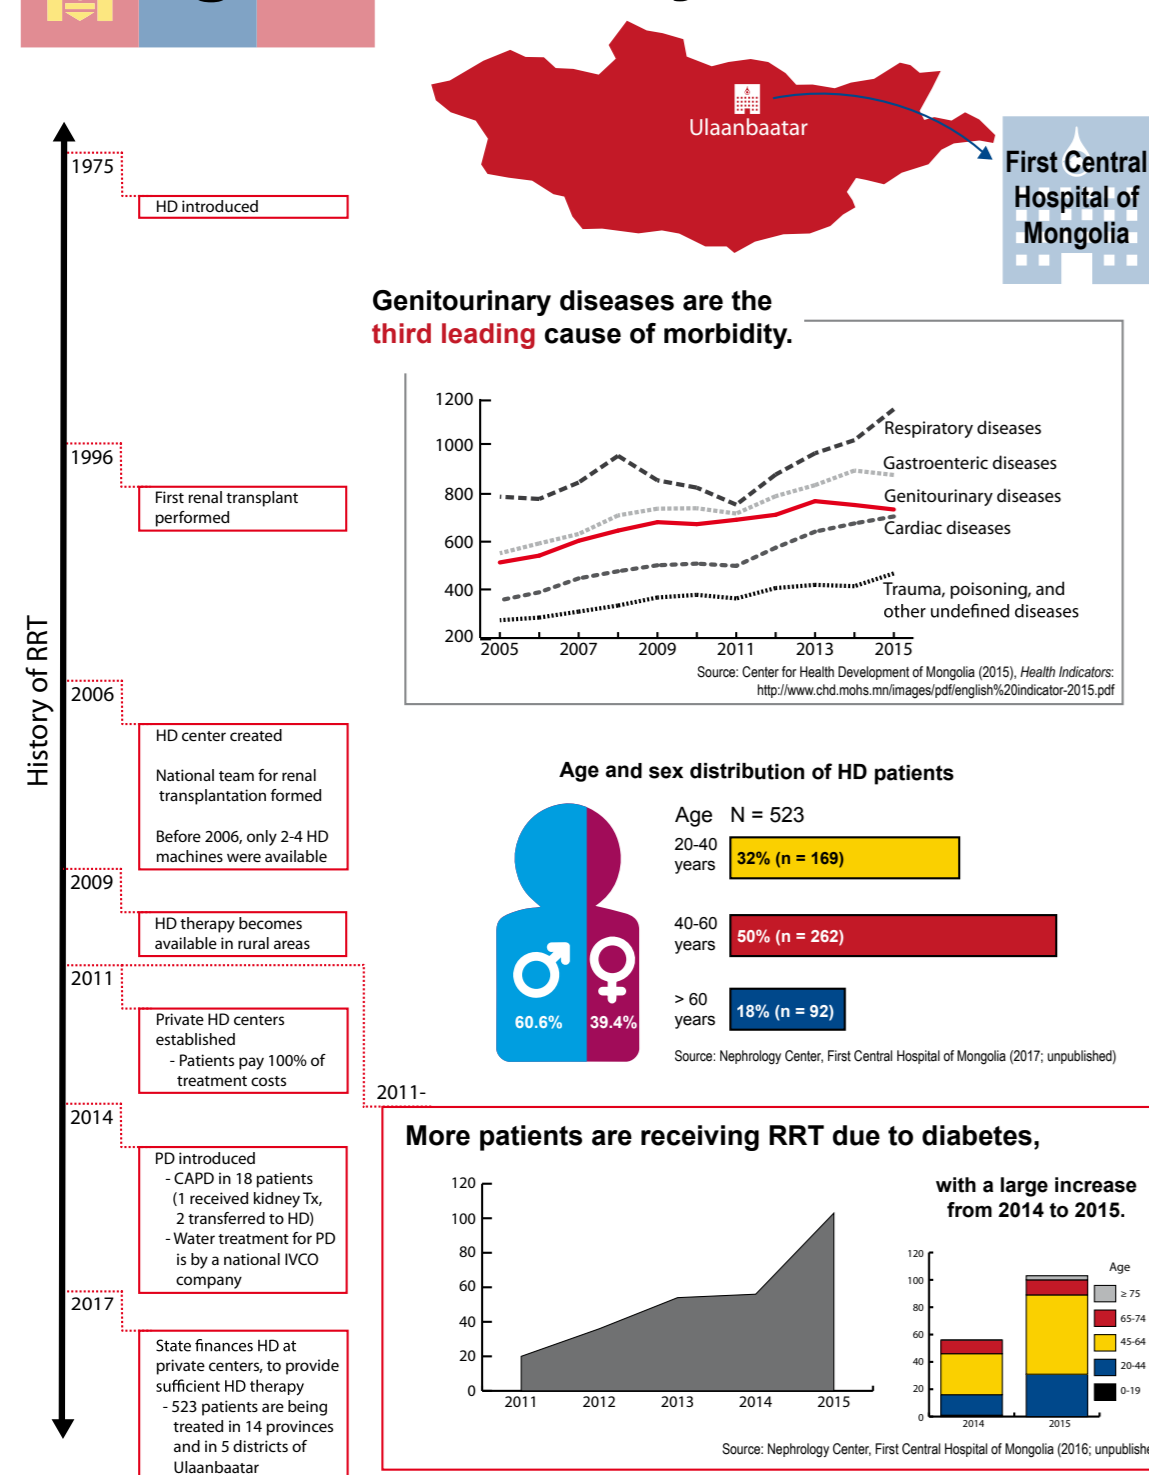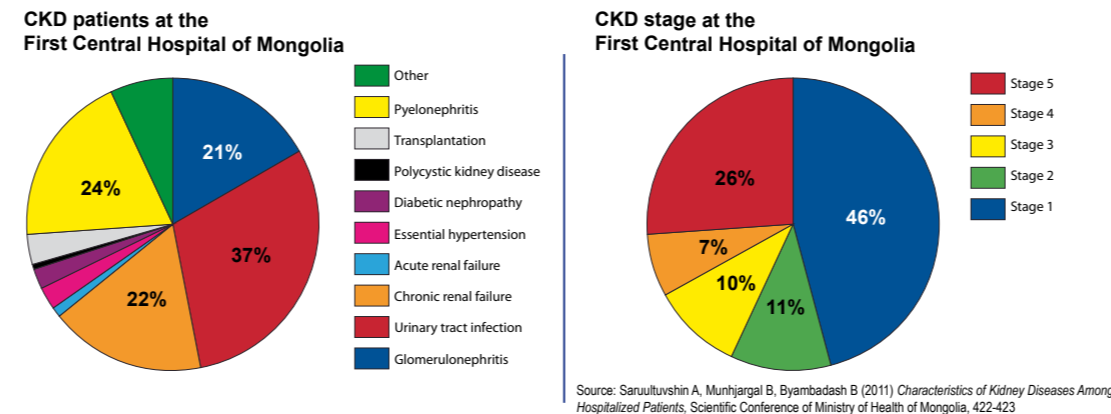

There are many more HD machines available in state hospitals than in private clinics (2017).

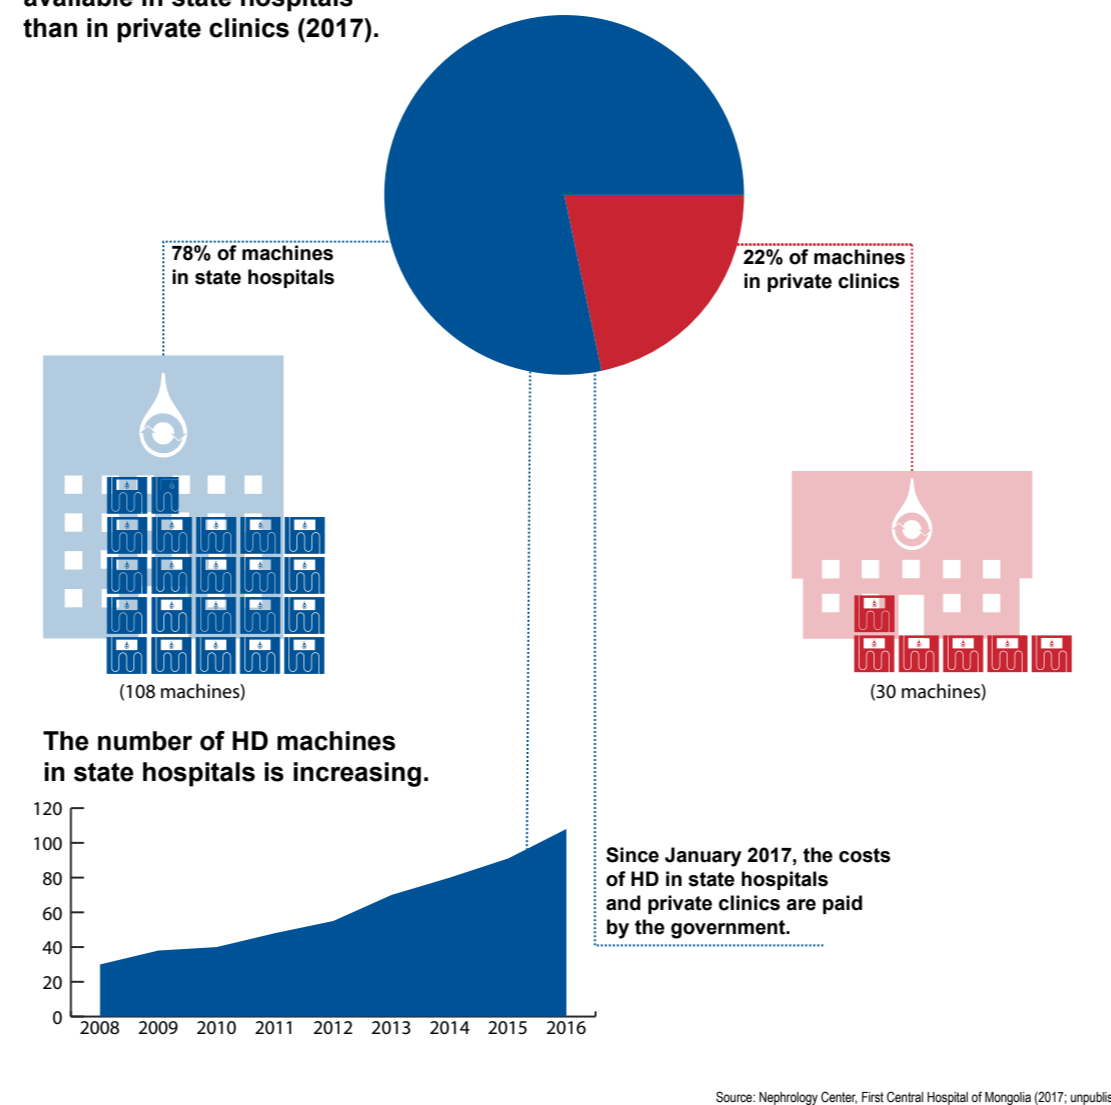

Vascular access for HD is mainly via AVF,

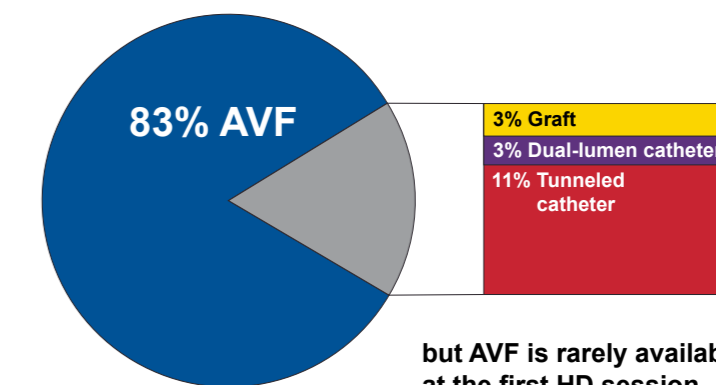

### Challenges going forward for RRT in Mongolia (2017)

- Monitoring and health education is inadequate, resulting in rapid progression to ESRD.
- Government financing for treatment, equipment, and infrastructure is insufficient.
- Mongolia does not provide training of HD engineers.
- Availability of AVF at time of first HD session is rare.
- Health insurance does not cover erythropoietin, phosphate-binders, vitamin D, or calcimimetic preparations.
- 43% of patients receive only 4-8 hours of HD per week due to the limited number of HD machines.

Fig. 4. Adiya et al., Blood Purif 2017;44(suppl 1):35-40.
