# Supplementary material
Source: publisher figshare collection journal article supplement (https://karger.figshare.com/articles/dataset/_/5372920)
Supplement: Supplementary file 1 [file 1 › BPU479576_Poster_6.pdf]

### Vietnam Country Status

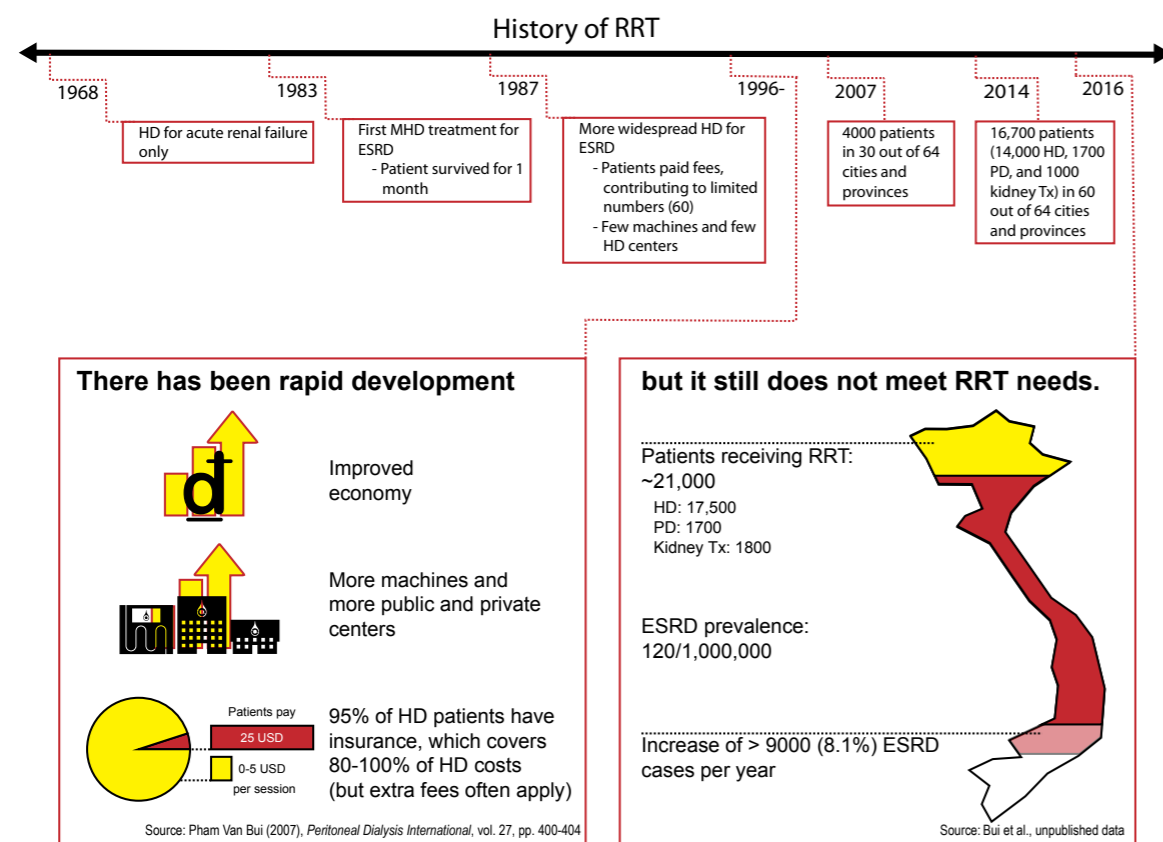

**The most common causes of CKD are**

- T2DM
- hypertension
- glomerulo-intestinal nephritides
- infection or urological-related disease.

**Vietnam is among the top 10 countries in Asia-Pacific with a rapid increase in T2DM.**

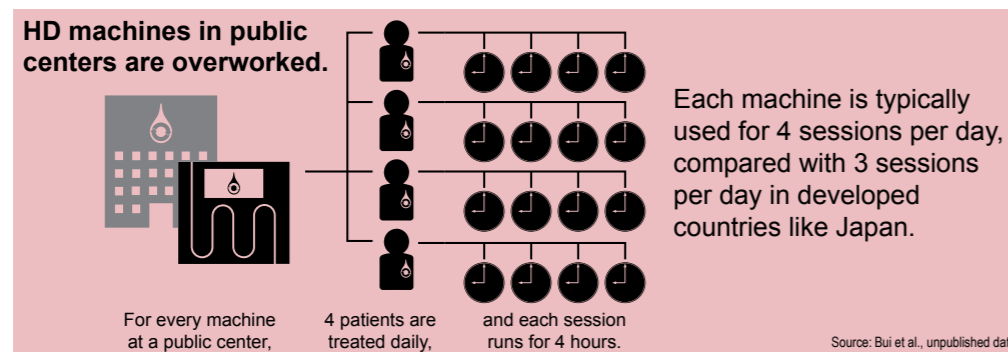

Numbers of HD centers, machines, and patients continue to increase.

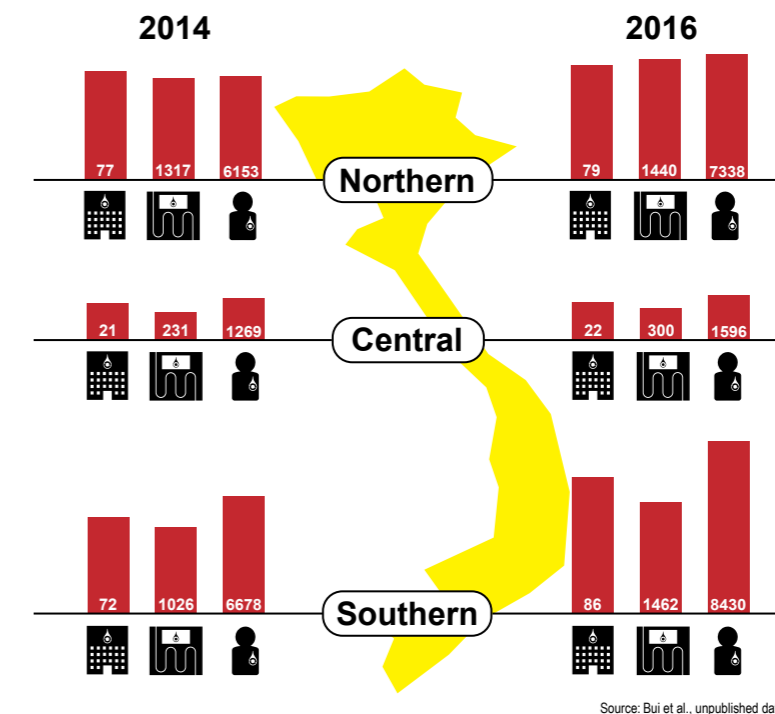

### Challenges going forward in Vietnam (2017)

- Only 21,000 of 90,000 patients in need of RRT are receiving treatment, and all HD facilities are overloaded.
- Low- rather than high-flux dialyzers are used, and dialyzers are reused many times (because the cost of a dialyzer is reimbursed only after 6 uses).
- Most patients are covered by health insurance, but HD is not always affordable due to extra treatment costs at many public and all private hospitals.
- Modern dialysis machines are available, but water quality for dialysis is questionable.
- There is also a major shortage of qualified health care providers.

Fig. 6. Bui et al., Blood Purif 2017;44(suppl 1):46-51.
