# Supplementary material
Source: publisher figshare collection journal article supplement (https://karger.figshare.com/articles/dataset/_/5372920)

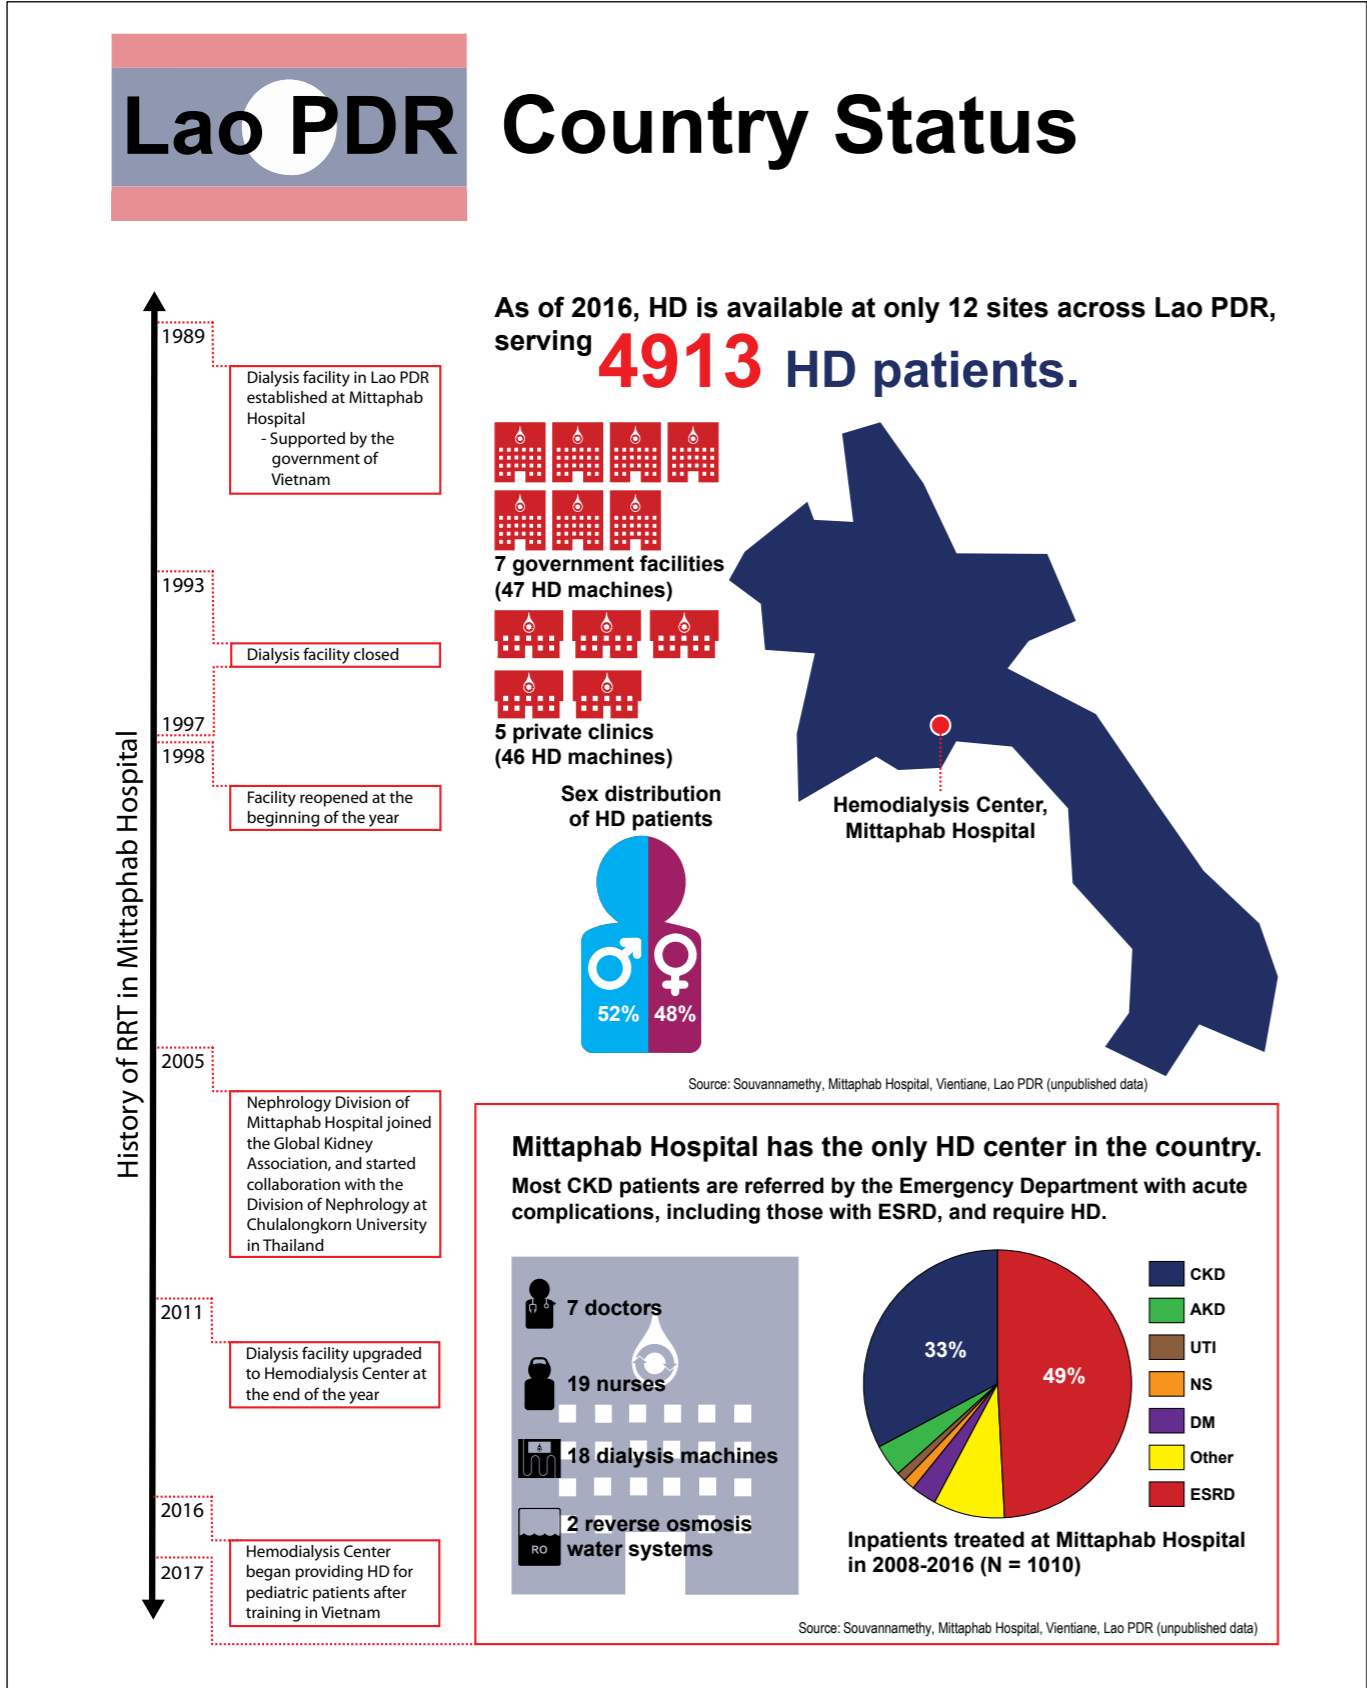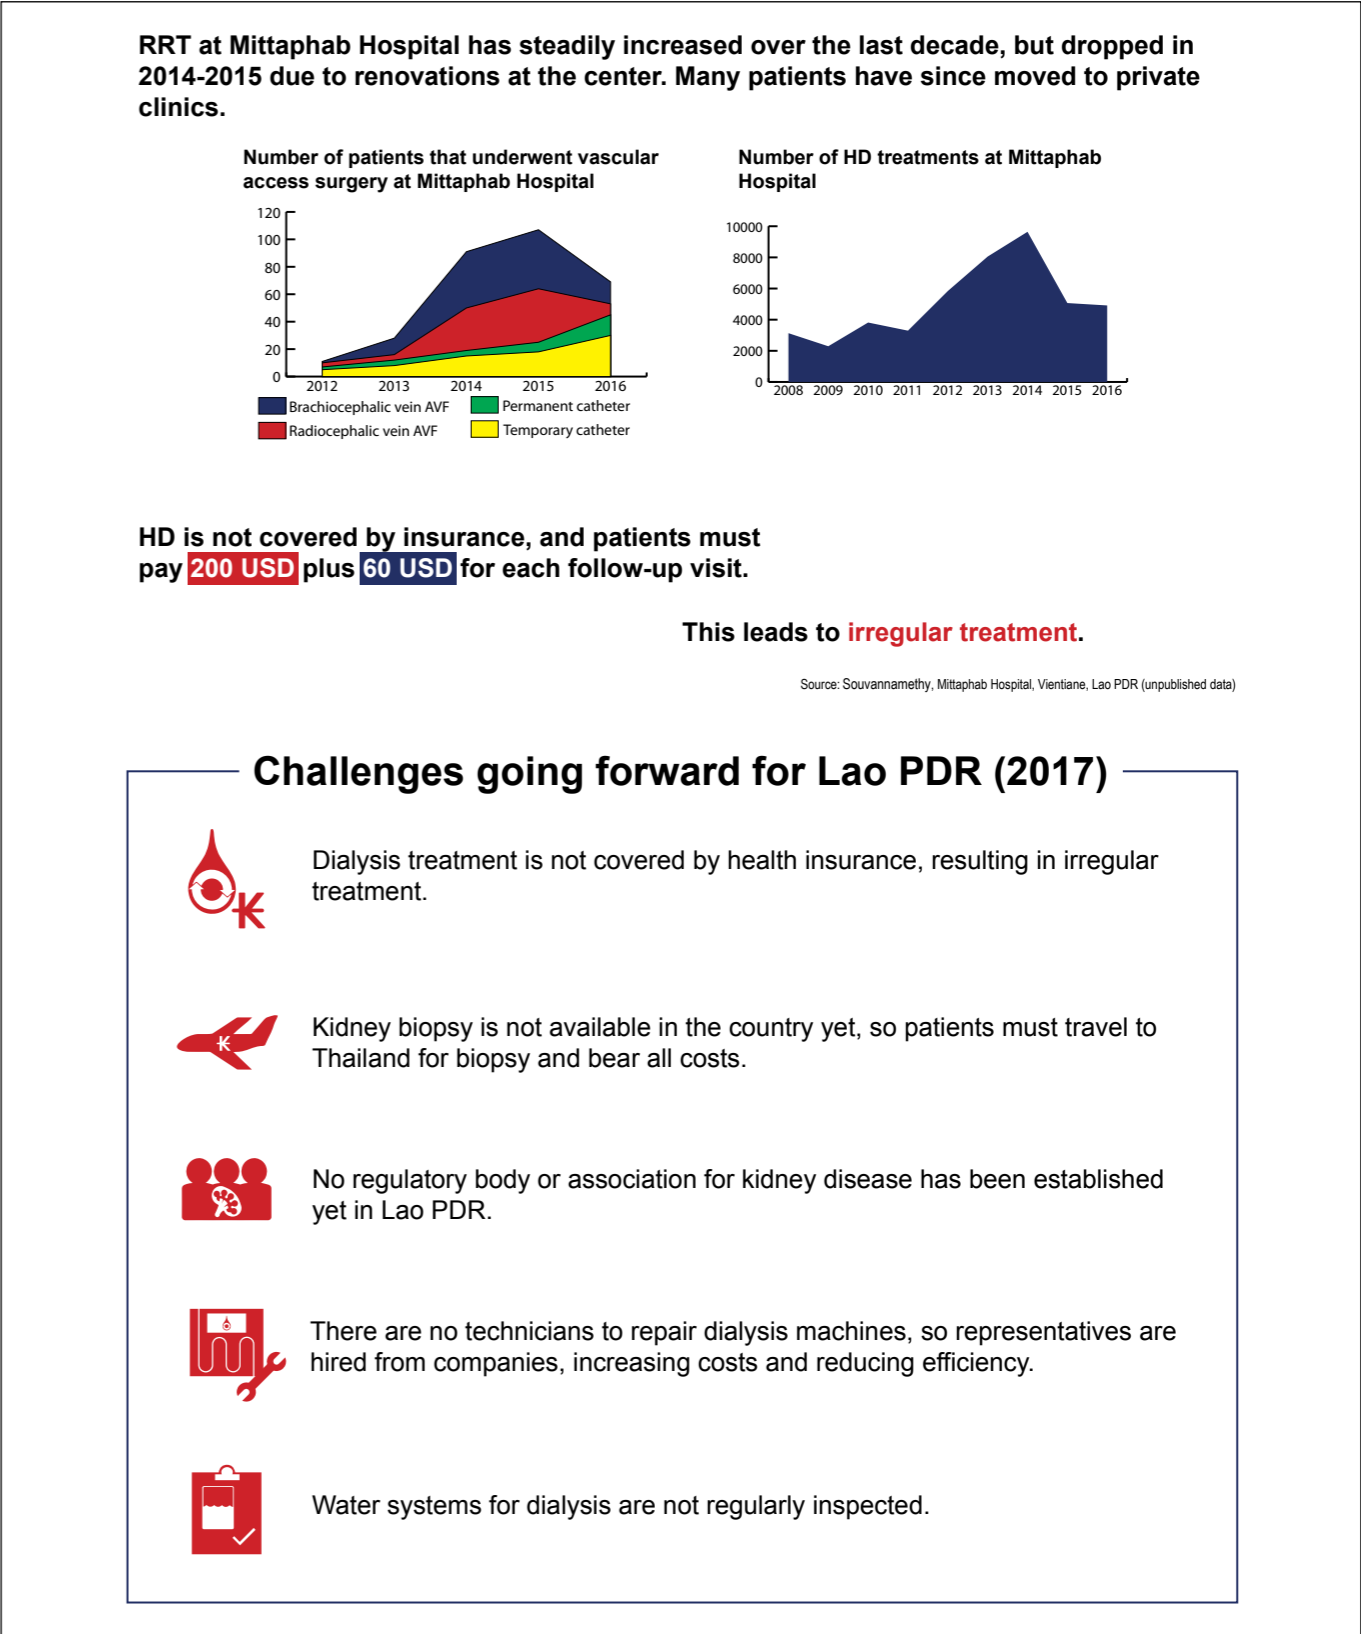

Fig. 3. Souvannamethy, Blood Purif 2017;44(suppl 1):31-34.

Supplement: Supplementary file 1 [file 1 › BPU479576_Poster_3.pdf]

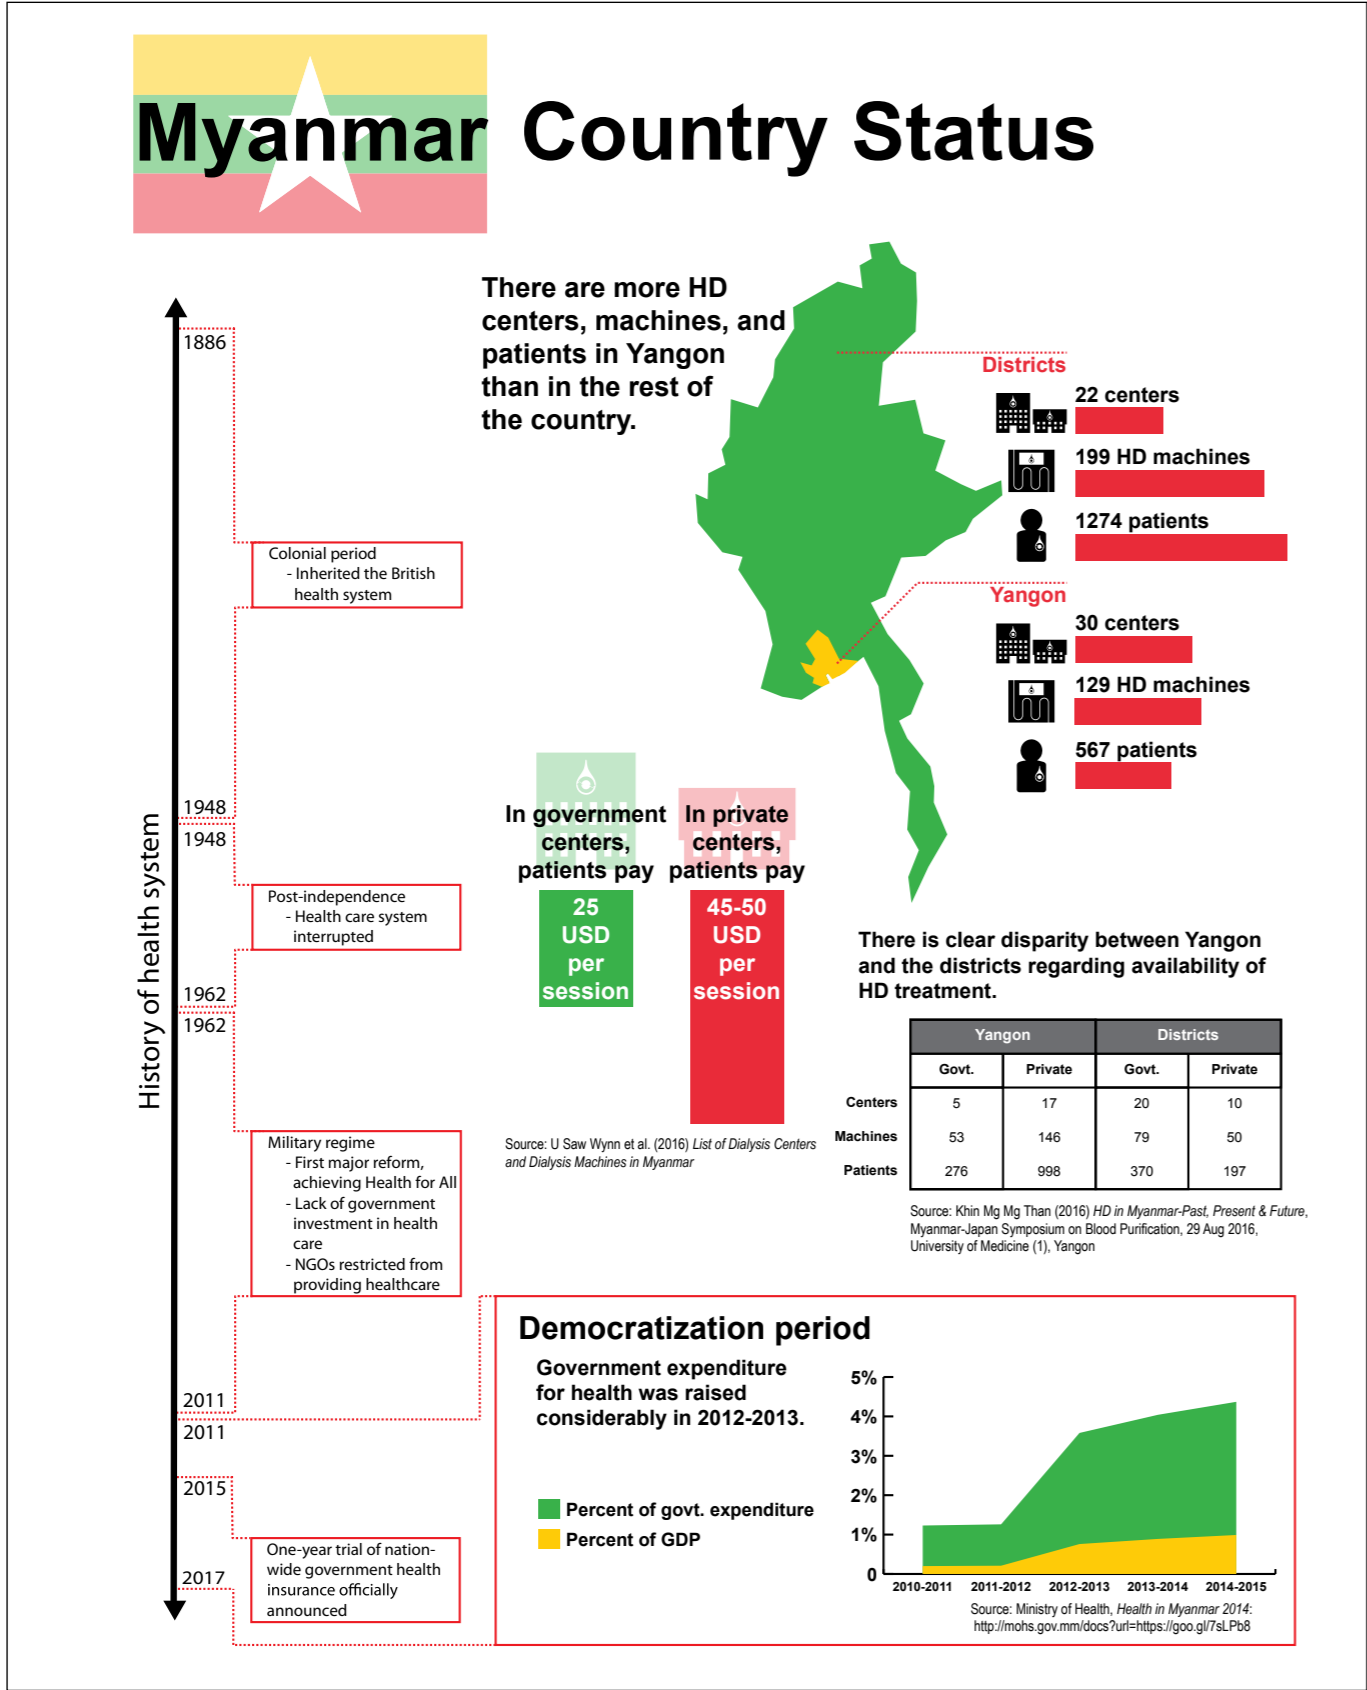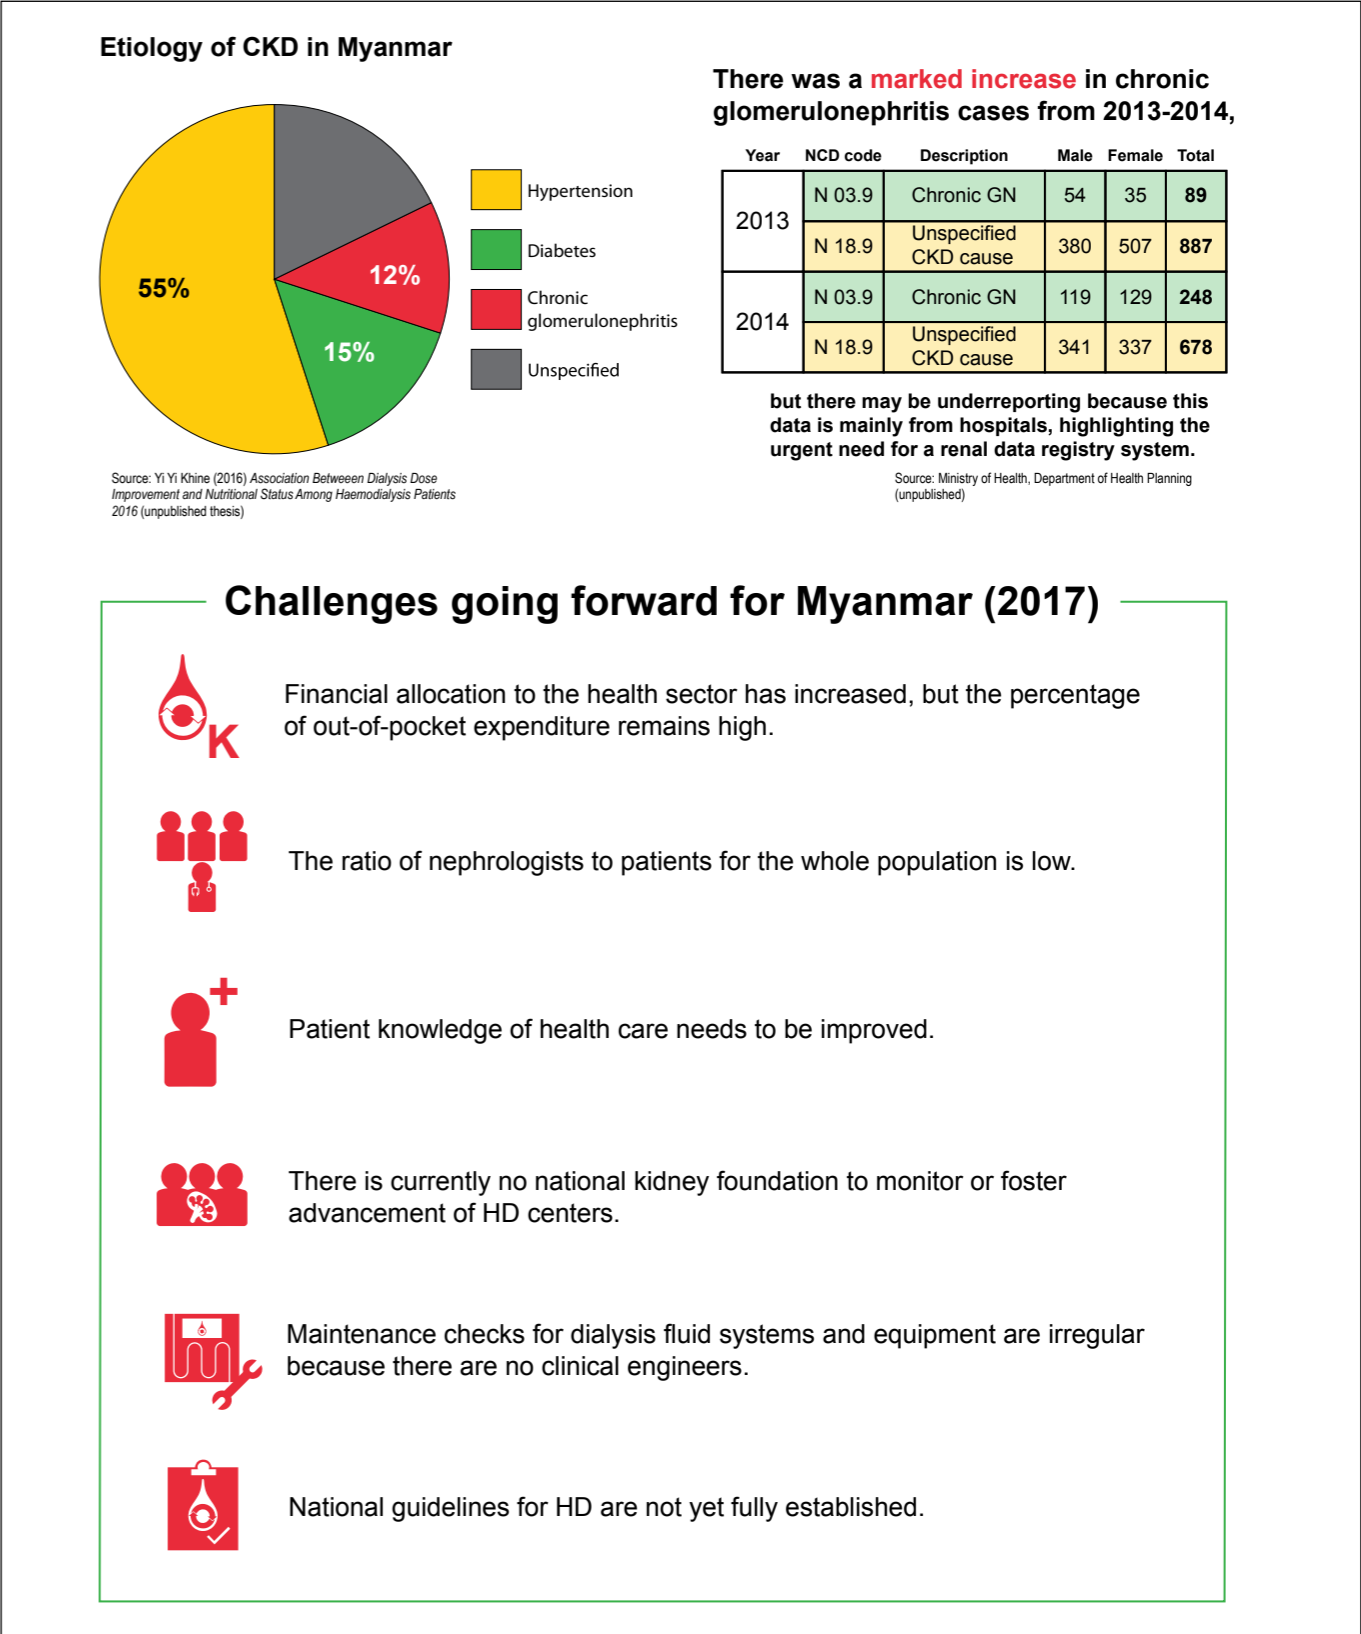

Fig. 5. Kine, Blood Purif 2017;44(suppl 1):41–45.

Supplement: Supplementary file 1 [file 1 › BPU479576_Poster_5.pdf]
